# Supplementary material for: Esrp1-Regulated Splicing of Arhgef11 Isoforms Is Required for Epithelial Tight Junction Integrity
Source: PubMed Central journal article supplement — Cell Rep. Author manuscript; Available in PMC 2019 Feb 12. (PMC6371790; doi:10.1016/j.celrep.2018.10.097), 2018-11-27
Supplement: NIHMS1516237-supplement-1.pdf [file NIHMS1516237-supplement-1.pdf]

**Cell Reports, Volume 25**

**Supplemental Information**

**Esrp1-Regulated Splicing of Arhgef11**

**Isoforms Is Required for Epithelial**

**Tight Junction Integrity**

**SungKyoung Lee, Benjamin Cieply, Yueqin Yang, Natoya Peart, Carl Glaser, Patricia Chan, and Russ P. Carstens**

Figure S1

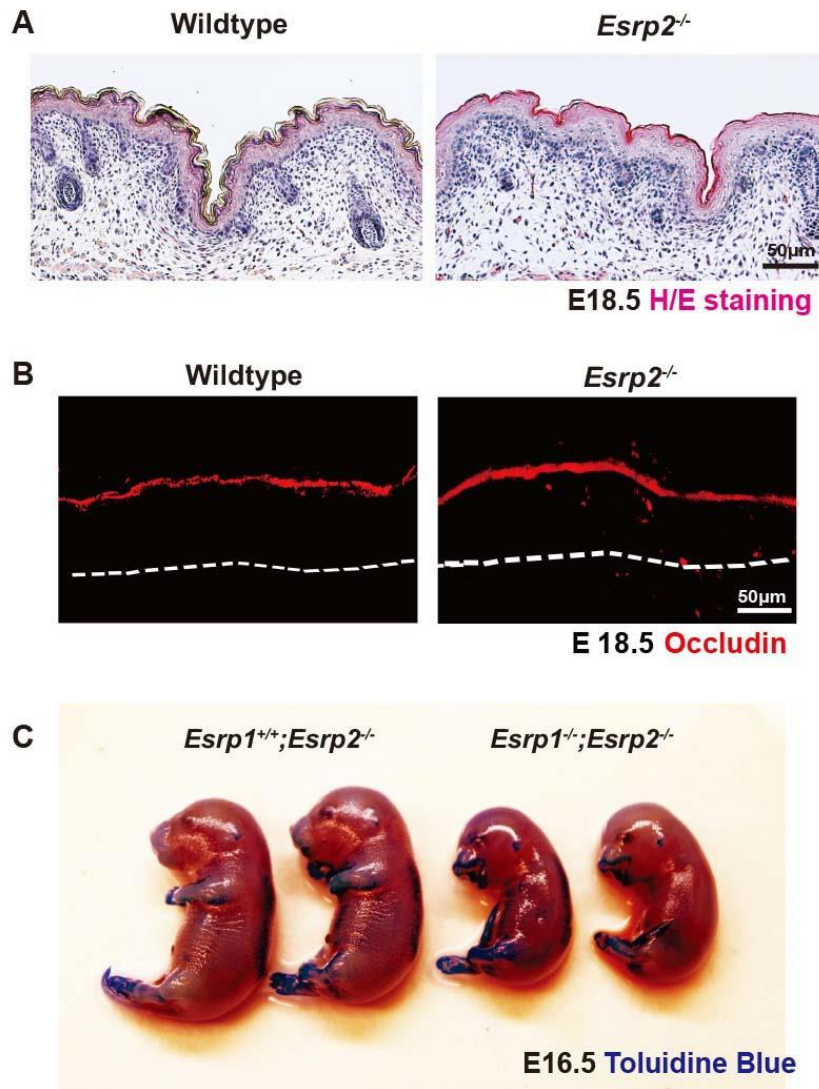

**Figure S1. Absence of Epidermal defects in *Esrp2*<sup>-/-</sup> mice. Related to Figure 1.** (A) H and E staining shows no difference between wildtype (*Esrp1*<sup>+/+</sup>;*Esrp2*<sup>+/+</sup>) and *Esrp2*<sup>-/-</sup> (*Esrp1*<sup>+/+</sup>;*Esrp2*<sup>-/-</sup>) epidermis (left panels). (B) Intact linear occludin staining in wildtype and *Esrp2*<sup>-/-</sup> epidermis (right panels). (C) *Esrp* DKO (*Esrp1*<sup>-/-</sup>;*Esrp2*<sup>-/-</sup>) epidermis show no apparent stratum corneum based barrier defect. Toluidine blue staining in E16.5 control (*Esrp1*<sup>+/+</sup>;*Esrp2*<sup>-/-</sup>) and *Esrp* DKO (*Esrp1*<sup>-/-</sup>;*Esrp2*<sup>-/-</sup>) embryos. Note the increased perioral staining is likely due to increased oral mucosal exposure due to the facial clefting defect.

Figure S2

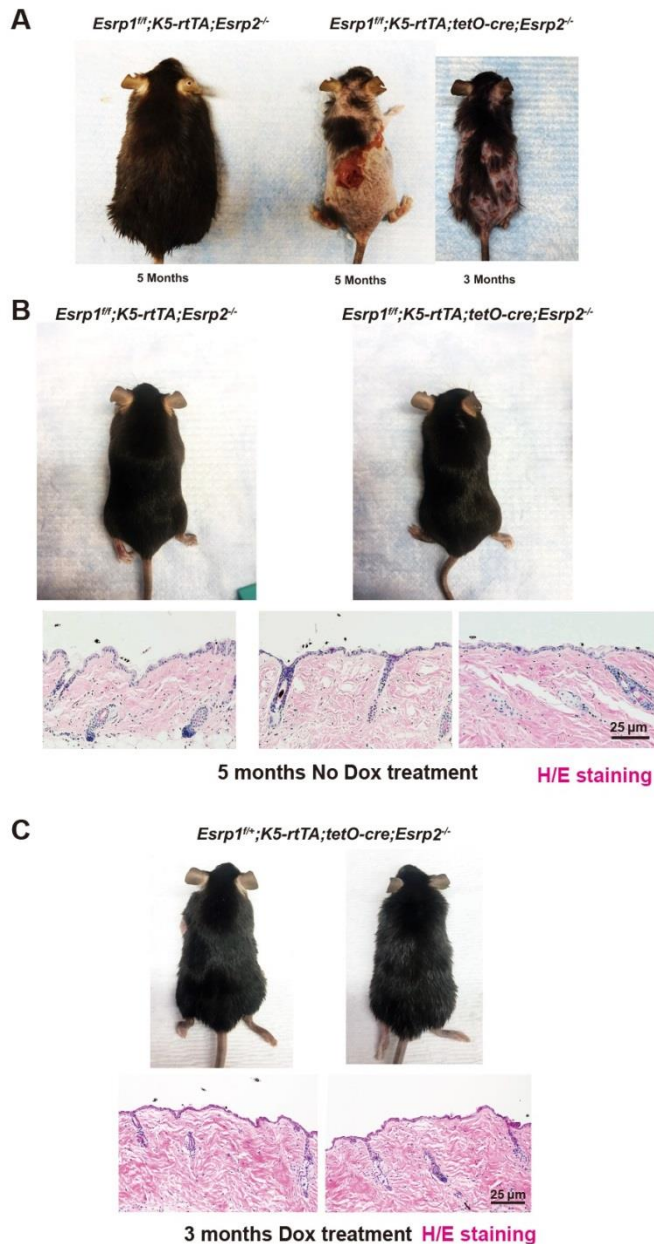

**Figure S2. Hair loss and epidermal inflammation in mice with inducible ablation of *Esrp1* and *Esrp2*.** Related to Figure 2. (A) 5 month control *Esrp1<sup>ff</sup>; K5-rtTA; Esrp2<sup>-/-</sup>* and 5 month or 3 month *Esrp1<sup>ff</sup>; Esrp2<sup>-/-</sup>; K5-rtTA; tetO-Cre* mice. (B, C) Additional controls showing no epidermal defects in mice due to Cre toxicity or leaky Cre expression. Two *Esrp1<sup>ff</sup>; K5-rtTA; tetO-Cre; Esrp2<sup>-/-</sup>* mice were evaluated at 5 months of age without doxycycline treatment and compared to an *Esrp1<sup>ff</sup>; K5-rtTA; Esrp2<sup>-/-</sup>* control (photographic image of the second mouse *Esrp1<sup>ff</sup>; K5-rtTA; tetO-Cre; Esrp2<sup>-/-</sup>* mouse not available). (C) Two *Esrp1<sup>ff/+</sup>; K5-rtTA; tetO-Cre; Esrp2<sup>-/-</sup>* mice (containing one non-floxed wild-type *Esrp1* allele) were evaluated at age 3 months after 3 months treatment with doxycycline.

**Figure S3**

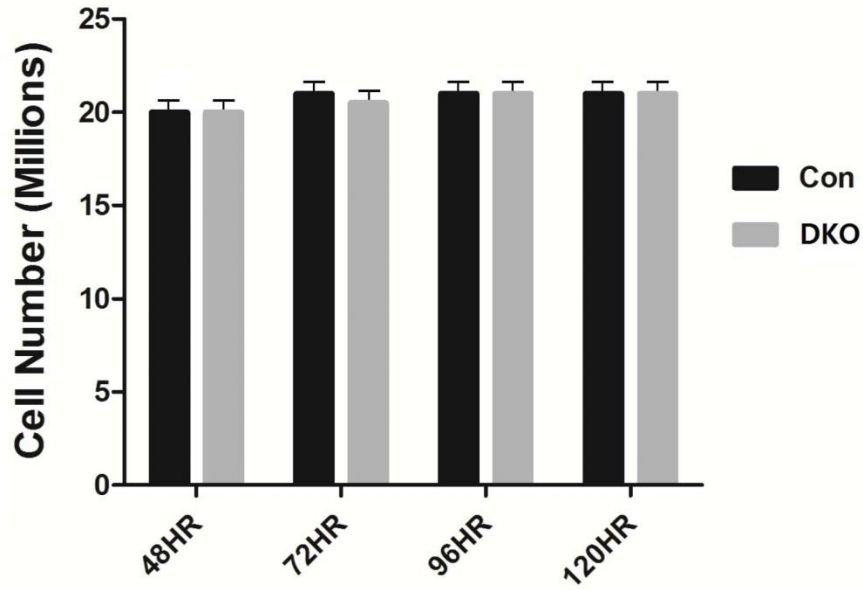

**Figure S3. No apparent differences in cell numbers between control and Esrp1<sup>-/-</sup>;Esrp2<sup>-/-</sup> (DKO) Py2T cells when plated on transwells. Related to Figure 4.** Py2T cells were independently plated on transwells in the presence of calcium under the same conditions used in Figure 4 D-F and harvested and counted at the indicated times.

Figure S4

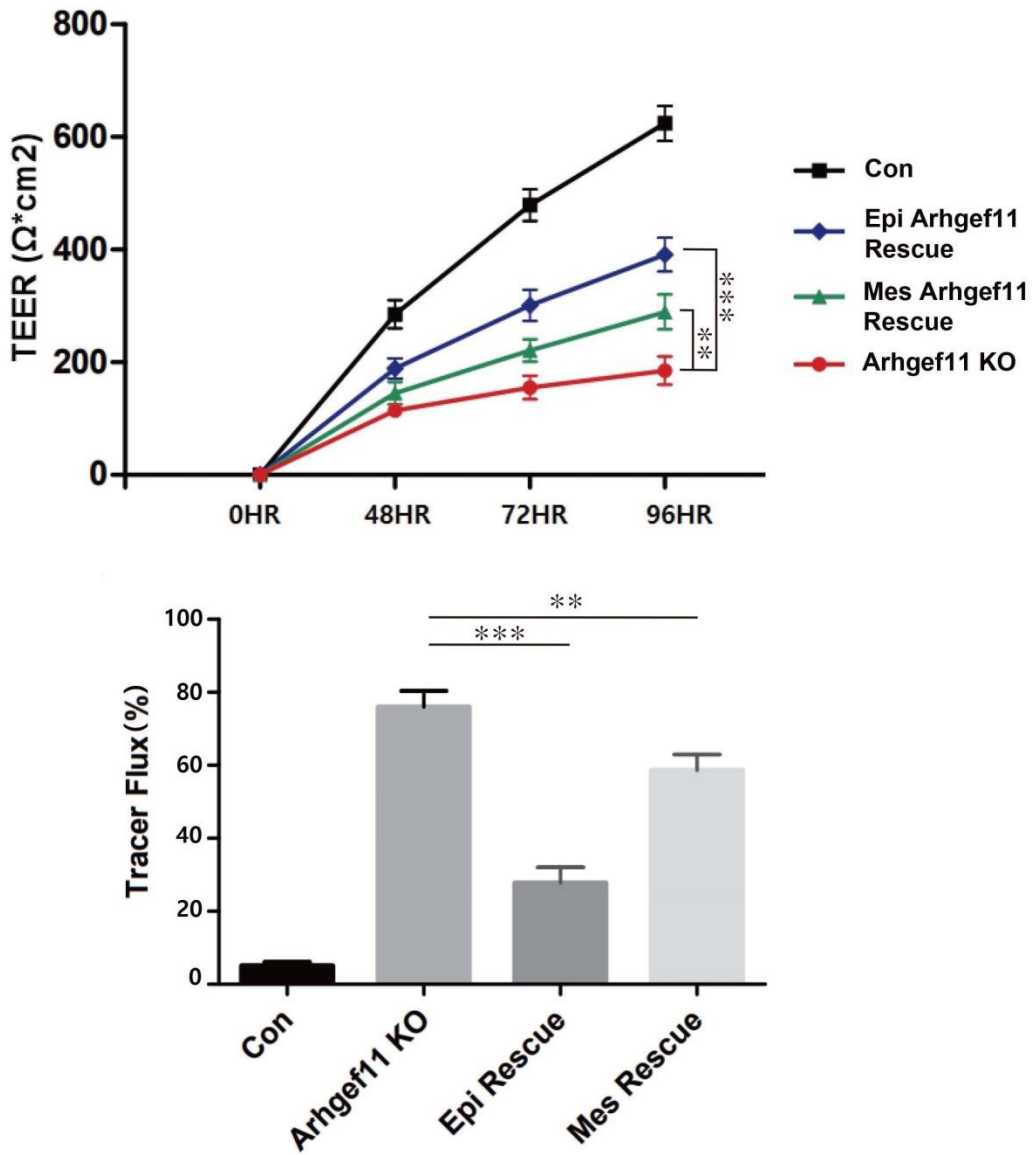

Py2T Cells

Figure S4. The alternative isoforms of mouse *Arhgef11*, like the human isoforms, also show preferential rescue of TEER and tracer flux with the epithelial isoform. Related to Figure 5. (A and B) TEER and FITC-dextran flux assay recovery difference between murine *Arhgef11* isoforms. Error bars indicate mean  $\pm$  SD.  $n = 3$ . Statistical significance comparing Epi/Mes rescue with *Arhgef11* KO was determined by t-test.  $P < 0.005$ ; \*\*,  $P < 0.001$ ; \*\*\*,  $P < 0.0001$ ; \*\*\*\*

**Figure S5**

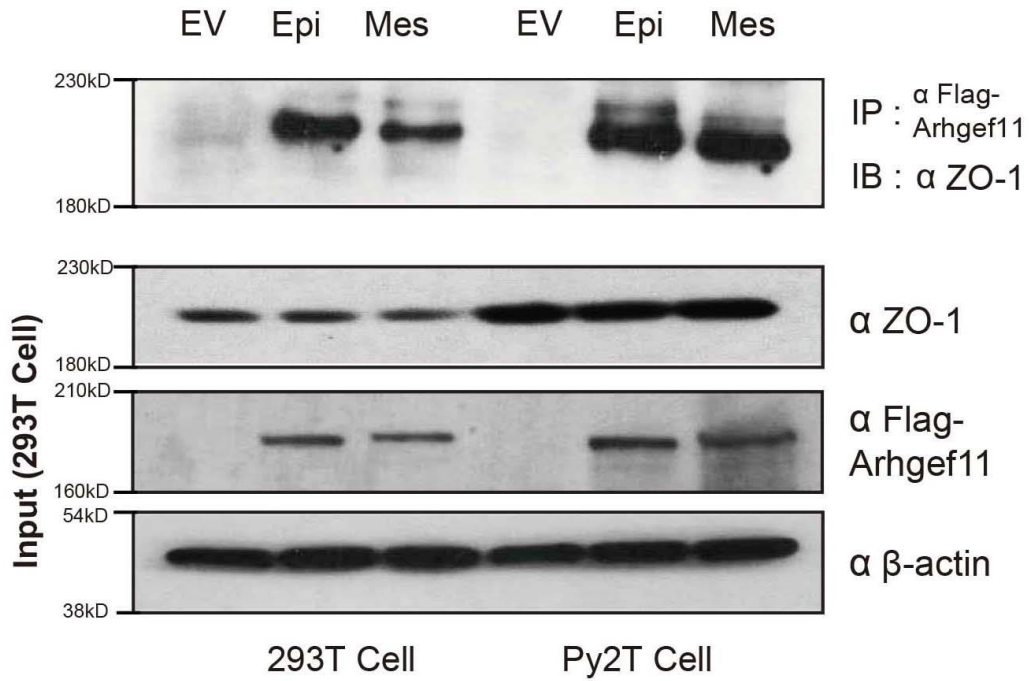

**Figure S5. Stably expressed epithelial and mesenchymal ARHGEF11 isoforms both interact with ZO-1. Related to Figure 6.** The indicated cells were transfected with cDNAs encoding the epithelial or mesenchymal isoforms of ARHGEF11 and pooled stably expressing cells were immunoprecipitated with anti-FLAG antibodies and blotted for ZO-1.

Figure S6

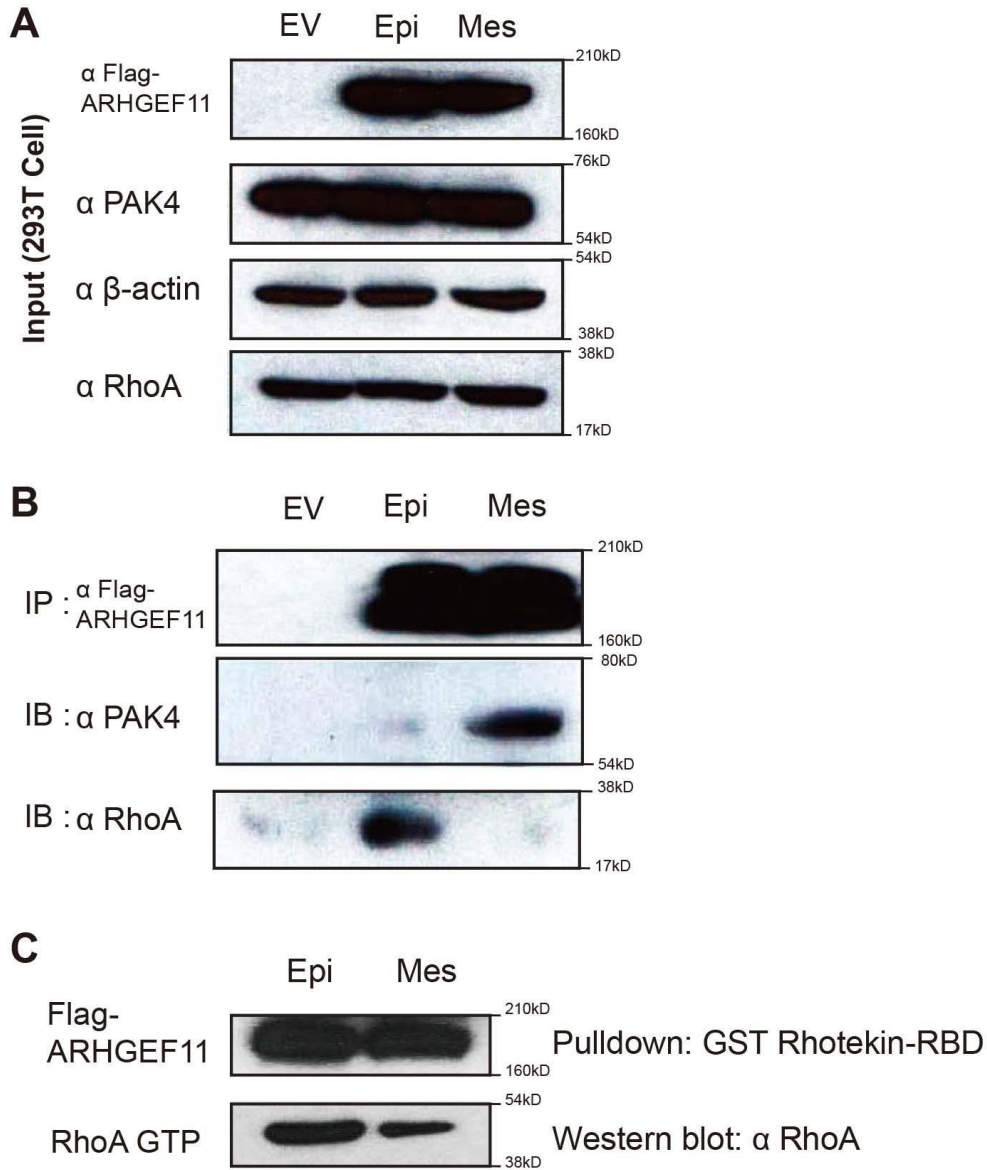

**Figure S6. Differential binding of the mesenchymal isoform of ARHGEF11 to PAK4. Related to Figure 6 B, C, D).** Additional replicate demonstrating the isoform-specific interaction of Arhgef11 mesenchymal isoforms with Pak4 and greater activation of RhoA by the epithelial Arhgef11 isoform than the mesenchymal isoform.

**Table S1. Single-guide RNA Sequences. Related to Figures 4 and 5.**

| Gene     | Exon Target | sgRNA Sequence |                      |
|----------|-------------|----------------|----------------------|
| Esrp1    | Exon1       | 8A             | GTCATGACGATAGGTGGGA  |
|          |             | 16A            | GGCGTCTCCGGATTACTTGG |
| Esrp2    | Exon2 and 3 | guide 40       | GCTCTCATTTGGCCTAGAGG |
|          |             | guide 43       | ACCCATCAAATTAAGGTGG  |
| Arhgef11 | Exon2       | Up crRNA1      | GTATGTCTGCAGAATATCAG |
|          |             | Down crRNA1    | TGGGACTGGAGACTGCACCC |

**Table S2. PCR primer sequences used to confirm CRISPR/Cas9 mediated KO. Related to Figures 4 and 5.**

| Gene     | Primer sequence |                          |
|----------|-----------------|--------------------------|
| Esrp1    | Forward         | AGGGTTTTAGCACAGGTTTTCTCG |
|          | Reverse         | GACAGGTTTTCGGCGTCTAT     |
| Esrp2    | Forward         | ATACAGCCCATACGGCATCA     |
|          | Reverse         | CTGCGAGTGGCCAAGTATGA     |
| Arhgef11 | Forward         | GTCCTGCCGTTGTCTCTTTGTT   |
|          | Reverse         | GTATGCCACTGTCTCTGCTGTA   |

**Table S3. shRNA sequences used for Esrp1 or Esrp2 knock down experiments. Related to Figure 1.**

| Gene        | Sequence |                                                             |
|-------------|----------|-------------------------------------------------------------|
| Control     | Forward  | CCGGCAACAAGATGAAGAGCACCAACTCGAGTTGGTGCCTTCATCTTGTGTTTTTG    |
|             | Reverse  | AATTCAAAAACAACAAGATGAAGGCACCAACTCGAGTTGGTGCCTTCATCTTGTG     |
| Esrp1 (RC1) | Forward  | CCGGCCTACCGAAGCTGCCATTTATCTCGAGATAAATGGCAGCTTCGGTAGGTTTTTG  |
|             | Reverse  | AATTCAAAAACCTACCGAAGCTGCCATTTATCTCGAGATAAATGGCAGCTTCGGTAGG  |
| Esrp1 (RC5) | Forward  | CCGGGAGTGCACATGGTATTGAATCCTCGAGGATTCAATACCATGTGCACTCTTTTTG  |
|             | Reverse  | AATTCAAAAAGAGTGCACATGGTATTGAATCCTCGAGGATTCAATACCATGTGCACTC  |
| Esrp2       | Forward  | CCGGCTTCTTTATGGCTCGTCAAAGCTCGAGCTTTGACGAGCCATAAAGAAGTTTTTG  |
|             | Reverse  | AATTCAAAAACCTTCTTTATGGCTCGTCAAAGCTCGAGCTTTGACGAGCCATAAAGAAG |
